# Supplementary material
Source: publisher figshare collection journal article supplement (https://acs.figshare.com/ndownloader/files/4716211)
Supplement: Supplementary file 1 [file 4716211]

# Electronic supplementary information (ESI) in the manuscript

## High-Pressure Synthesis and Properties of Solid Solutions Between BiMnO<sub>3</sub> and BiScO<sub>3</sub>

Alexei A. Belik,<sup>1,\*</sup> Tadahiro Yokosawa,<sup>2</sup> Koji Kimoto,<sup>2</sup> Yoshio Matsui,<sup>2</sup> and Eiji Takayama-Muromachi<sup>1</sup>

*Advanced Nano Materials Laboratory (ANML) and High Voltage Electron Microscopy Station (HVEMS), National Institute for Materials Science (NIMS), 1-1 Namiki, Tsukuba, Ibaraki 305-0044, Japan*

<sup>1</sup> ANML, NIMS

<sup>2</sup> HVEMS, NIMS

\* Author to whom correspondence should be addressed.

Advanced Nano Materials Laboratory, National Institute for Materials Science, Namiki 1-1, Tsukuba, Ibaraki, 305-0044, Japan. E-mail: Alexei.BELIK@nims.go.jp

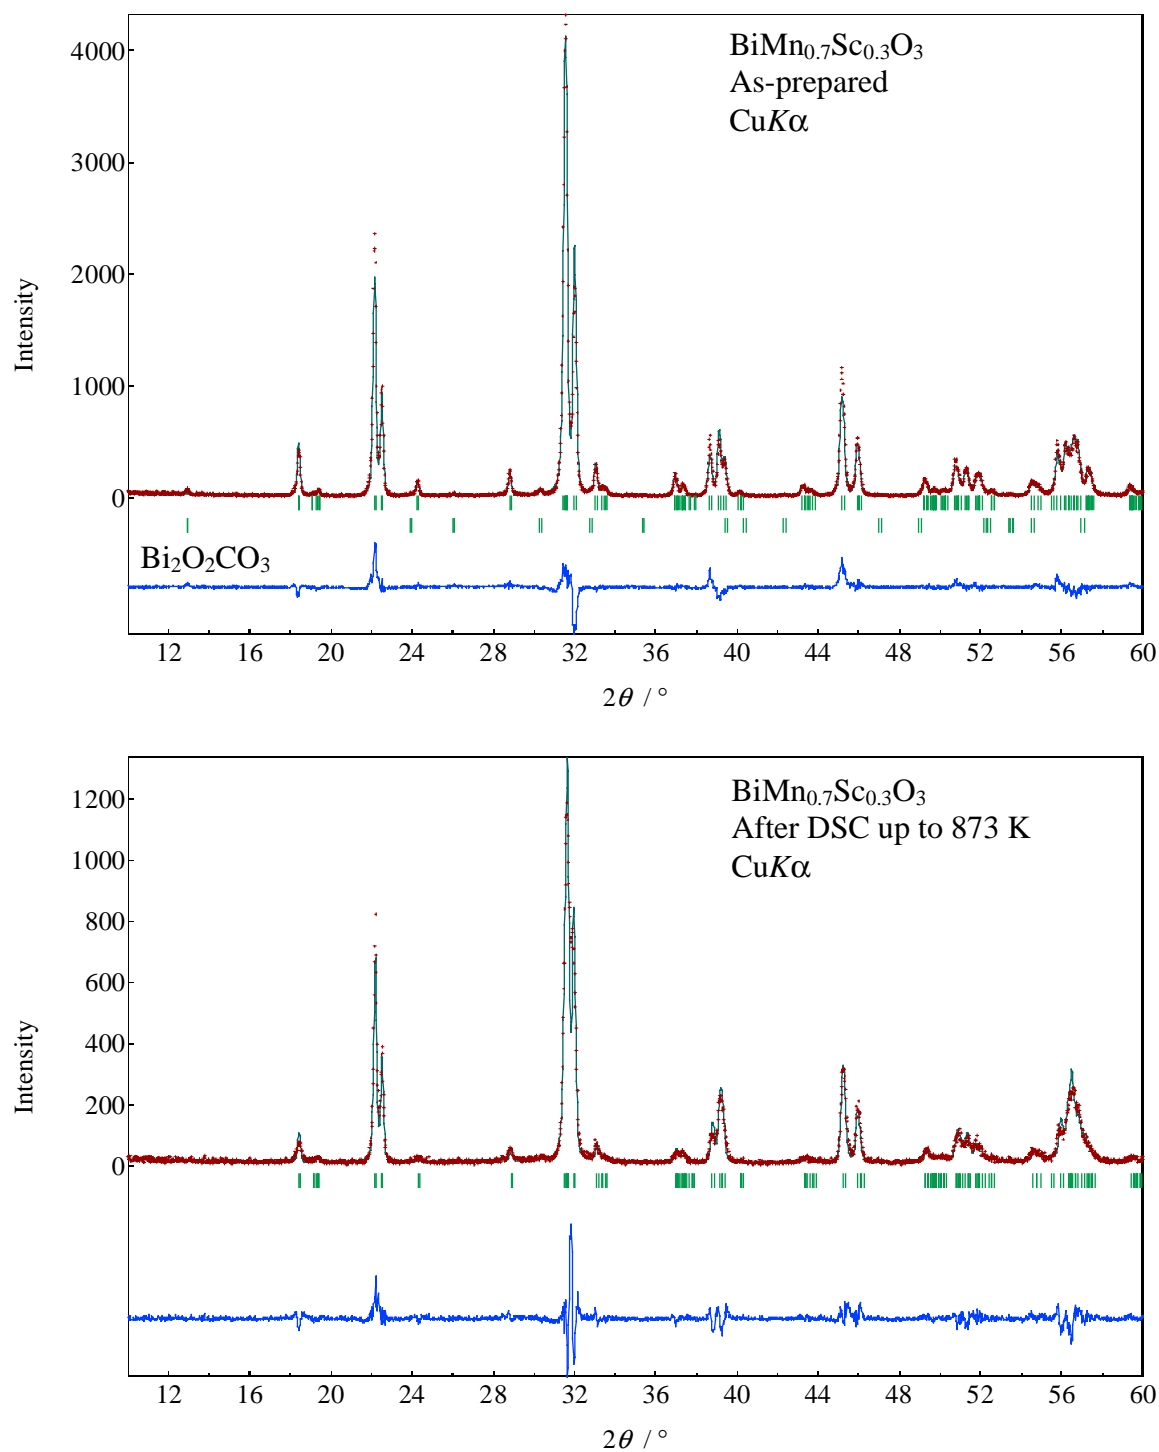

**Fig. S1a.** XRD patterns of the as-prepared  $\text{BiMn}_{0.7}\text{Sc}_{0.3}\text{O}_3$  and after the DSC experiment up to 873 K.

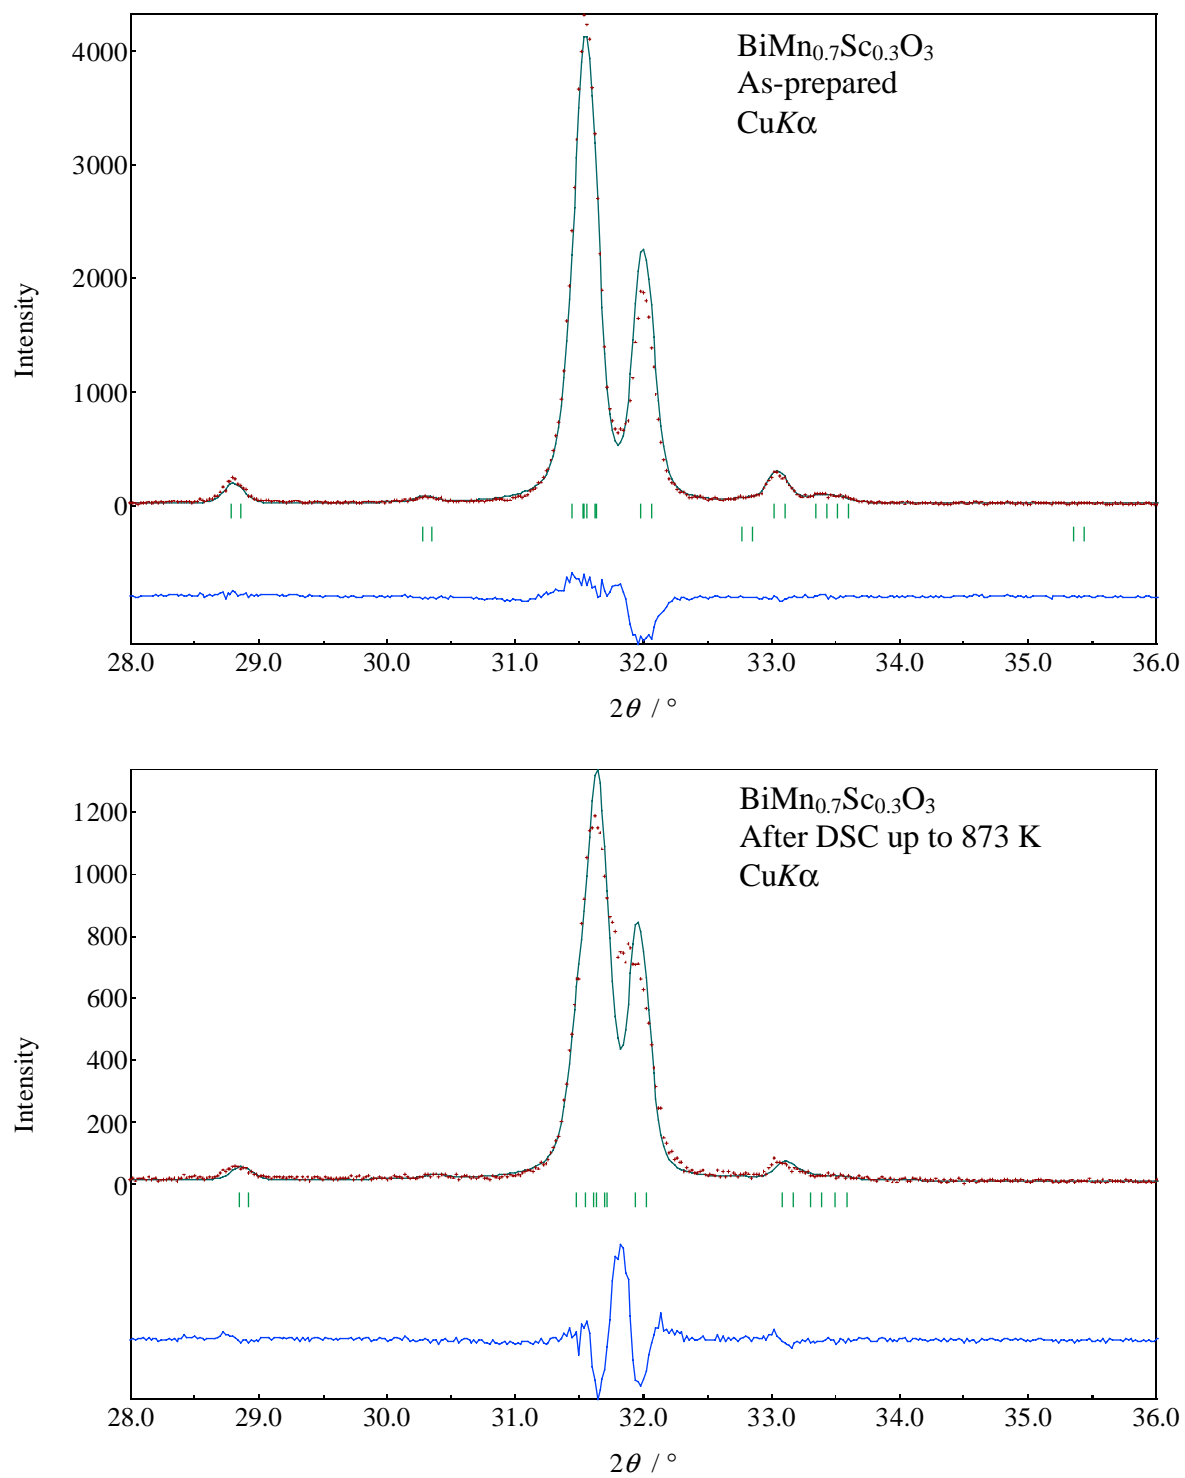

**Fig. S1b.** Fragments of the XRD patterns of the as-prepared  $\text{BiMn}_{0.7}\text{Sc}_{0.3}\text{O}_3$  and after the DSC experiment up to 873 K.

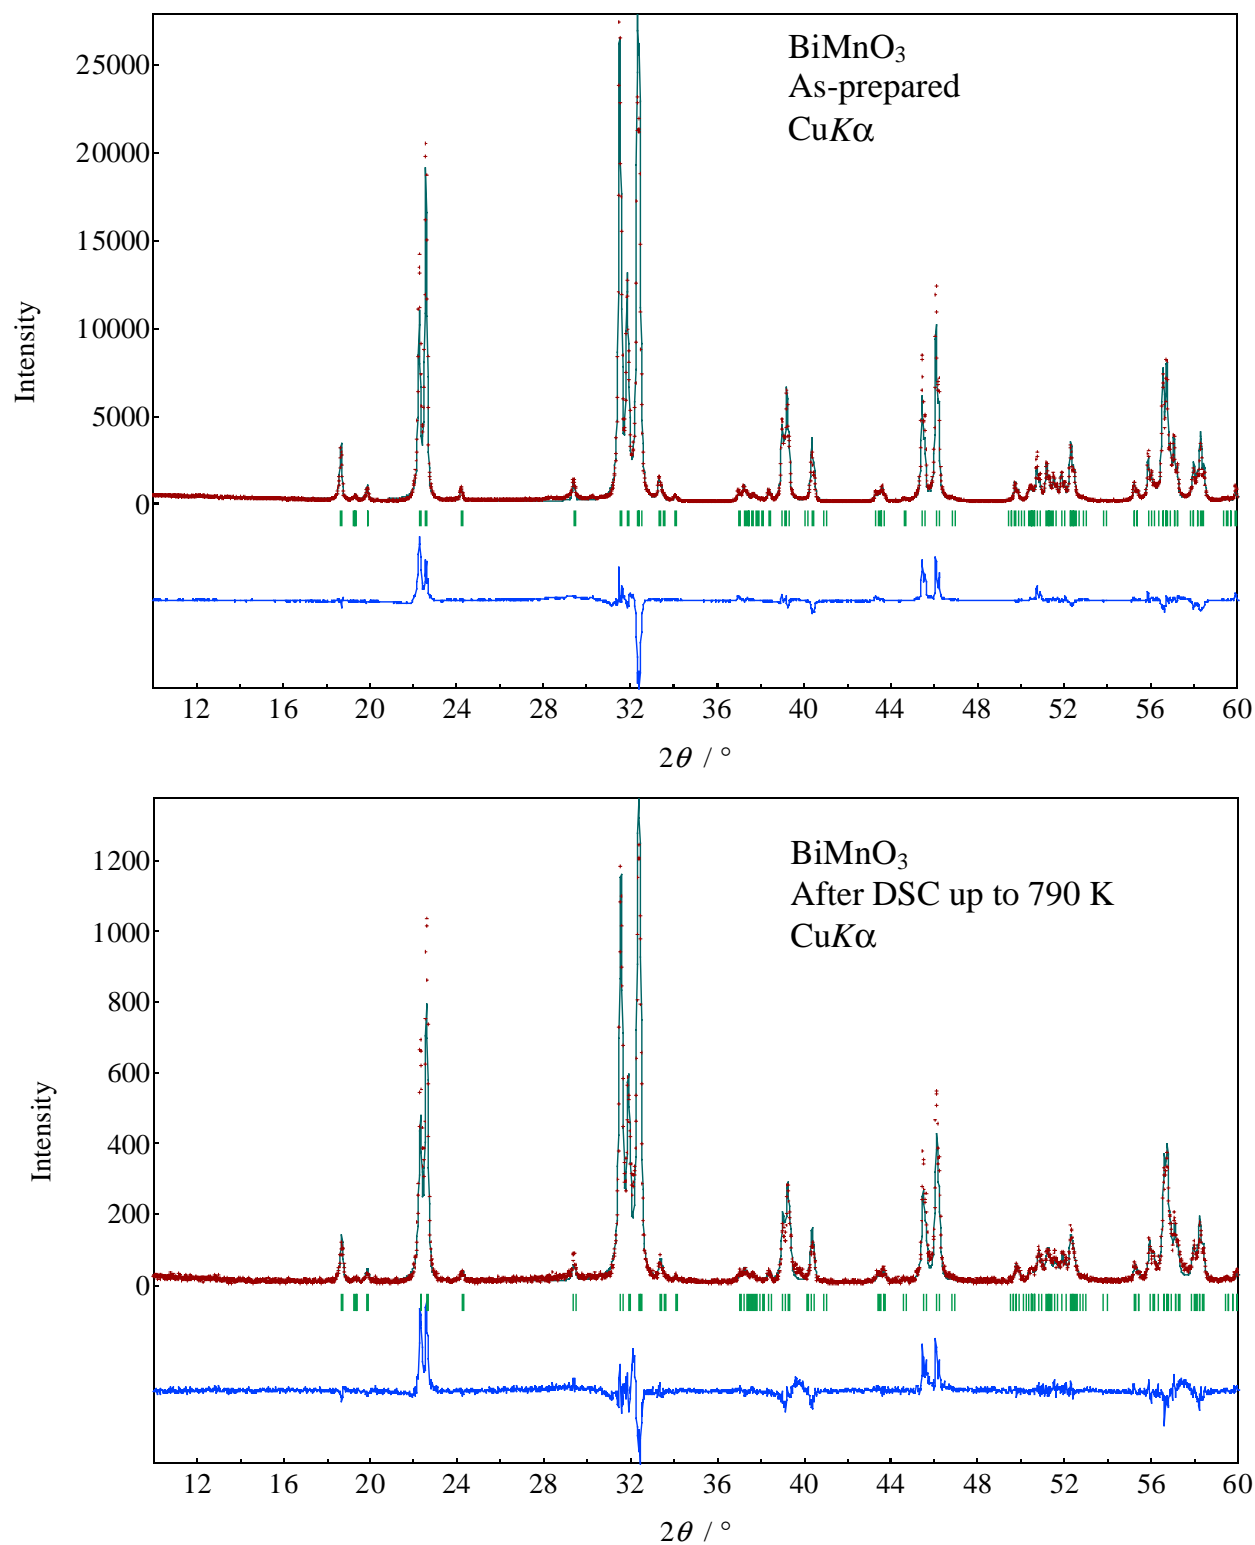

**Fig. S1c.** Fragments of the XRD patterns of the as-prepared  $\text{BiMnO}_3$  and after the DSC experiment up to 790 K.

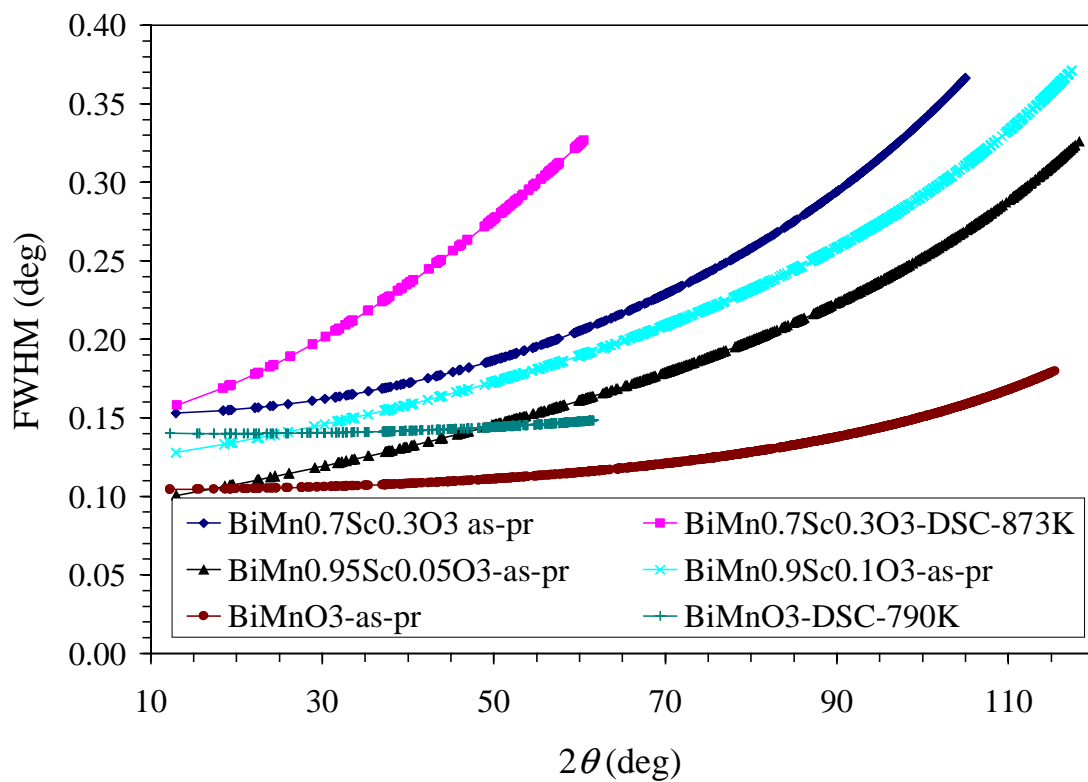

**Fig. S1d.** Full-width at half maximum vs  $2\theta$  in the as-prepared (as-pr) BiMnO<sub>3</sub>, BiMn<sub>0.95</sub>Sc<sub>0.05</sub>O<sub>3</sub>, BiMn<sub>0.9</sub>Sc<sub>0.1</sub>O<sub>3</sub>, and BiMn<sub>0.7</sub>Sc<sub>0.3</sub>O<sub>3</sub>, BiMnO<sub>3</sub> after DSC up to 790 K, and BiMn<sub>0.7</sub>Sc<sub>0.3</sub>O<sub>3</sub> after DSC up to 873 K.

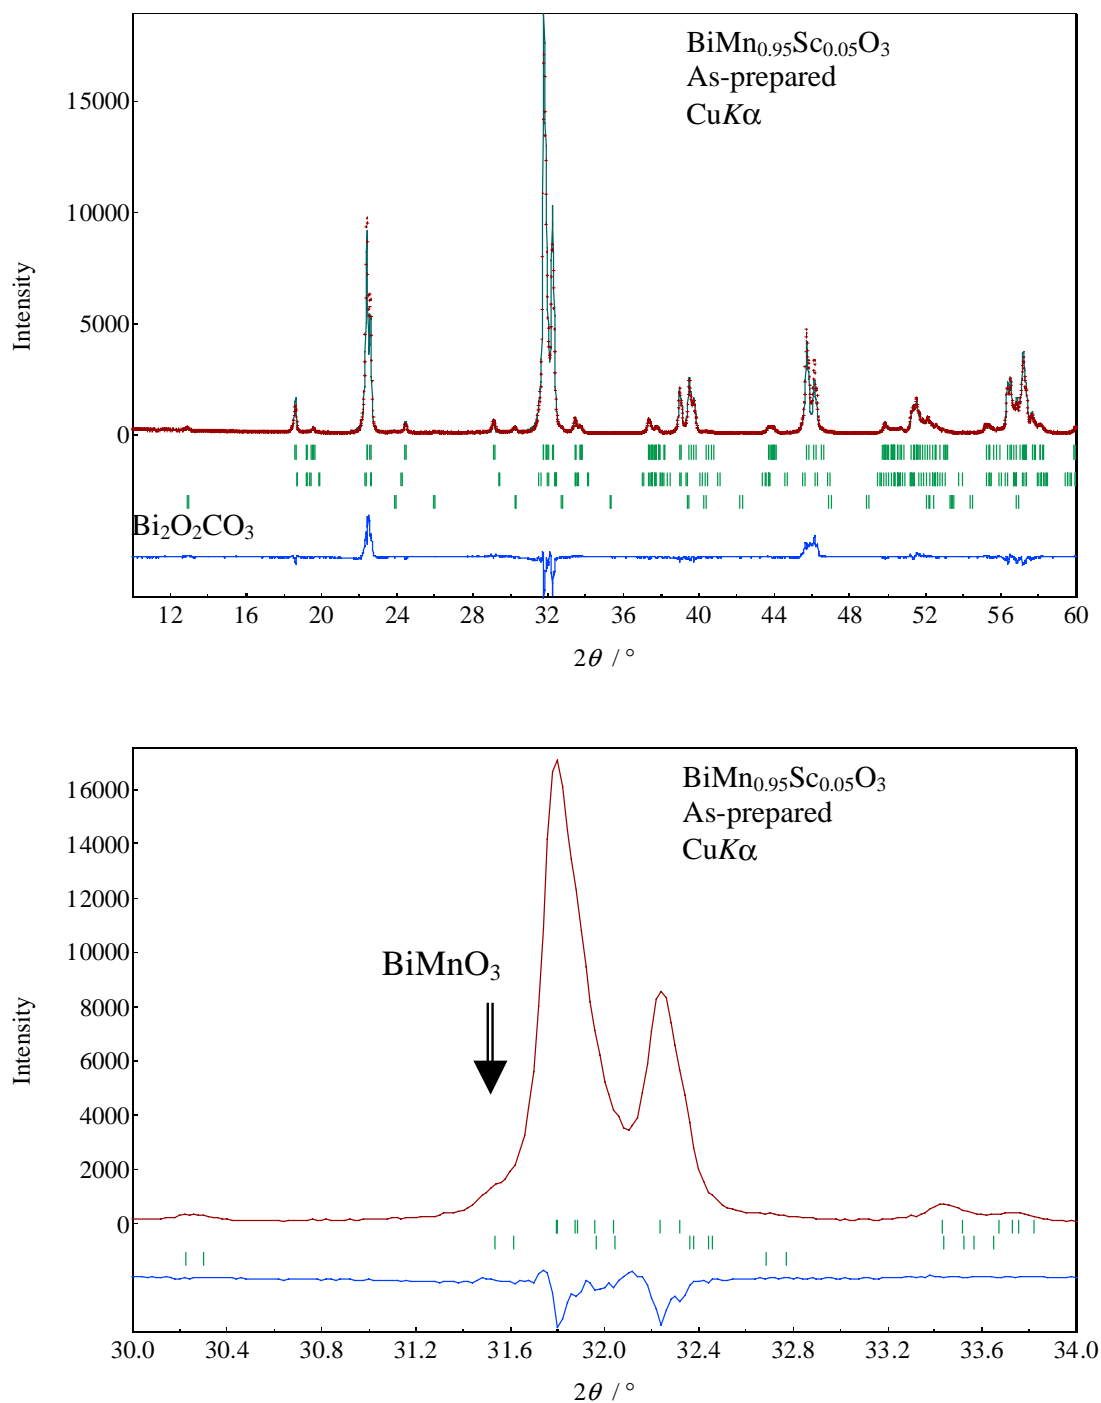

**Fig. S2a.** Fragments of the XRD patterns of the as-prepared  $\text{BiMn}_{0.95}\text{Sc}_{0.05}\text{O}_3$ . The brown lines and dots show the experimental curves, the green lines are the calculated curves, and the blue lines are the difference curves. The green tick marks show the positions of possible Bragg reflections.

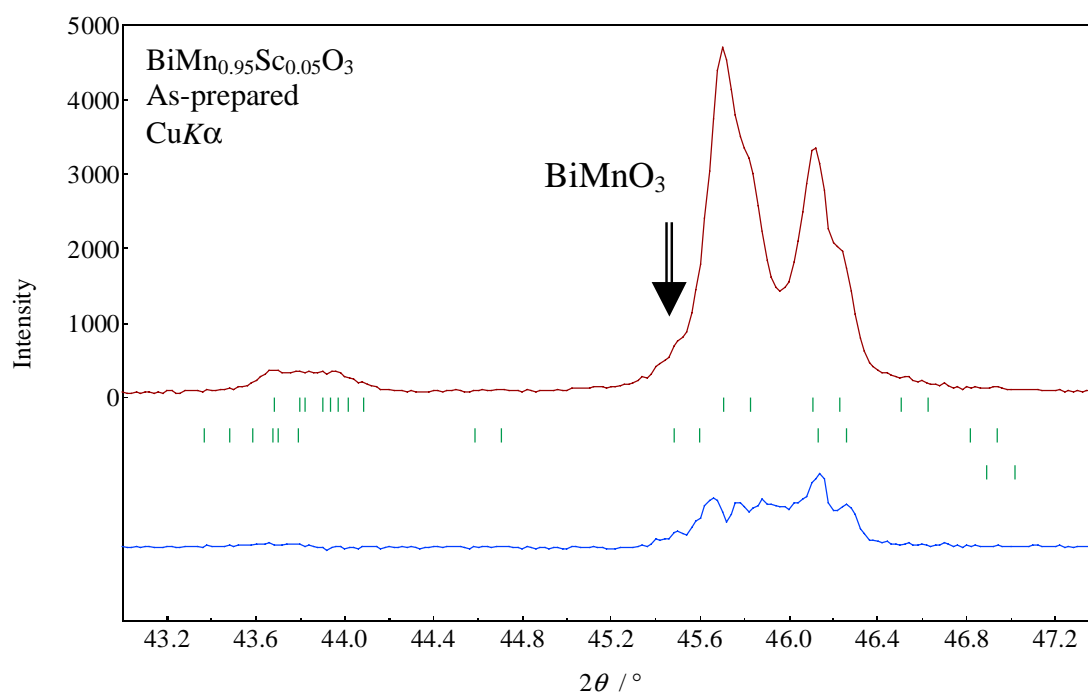

**Fig. S2b.** Fragments of the XRD patterns of the as-prepared  $\text{BiMn}_{0.95}\text{Sc}_{0.05}\text{O}_3$ . The brown line shows the experimental curve, the green line is the calculated curve, and the blue line is the difference curve. The green tick marks show the positions of possible Bragg reflections.

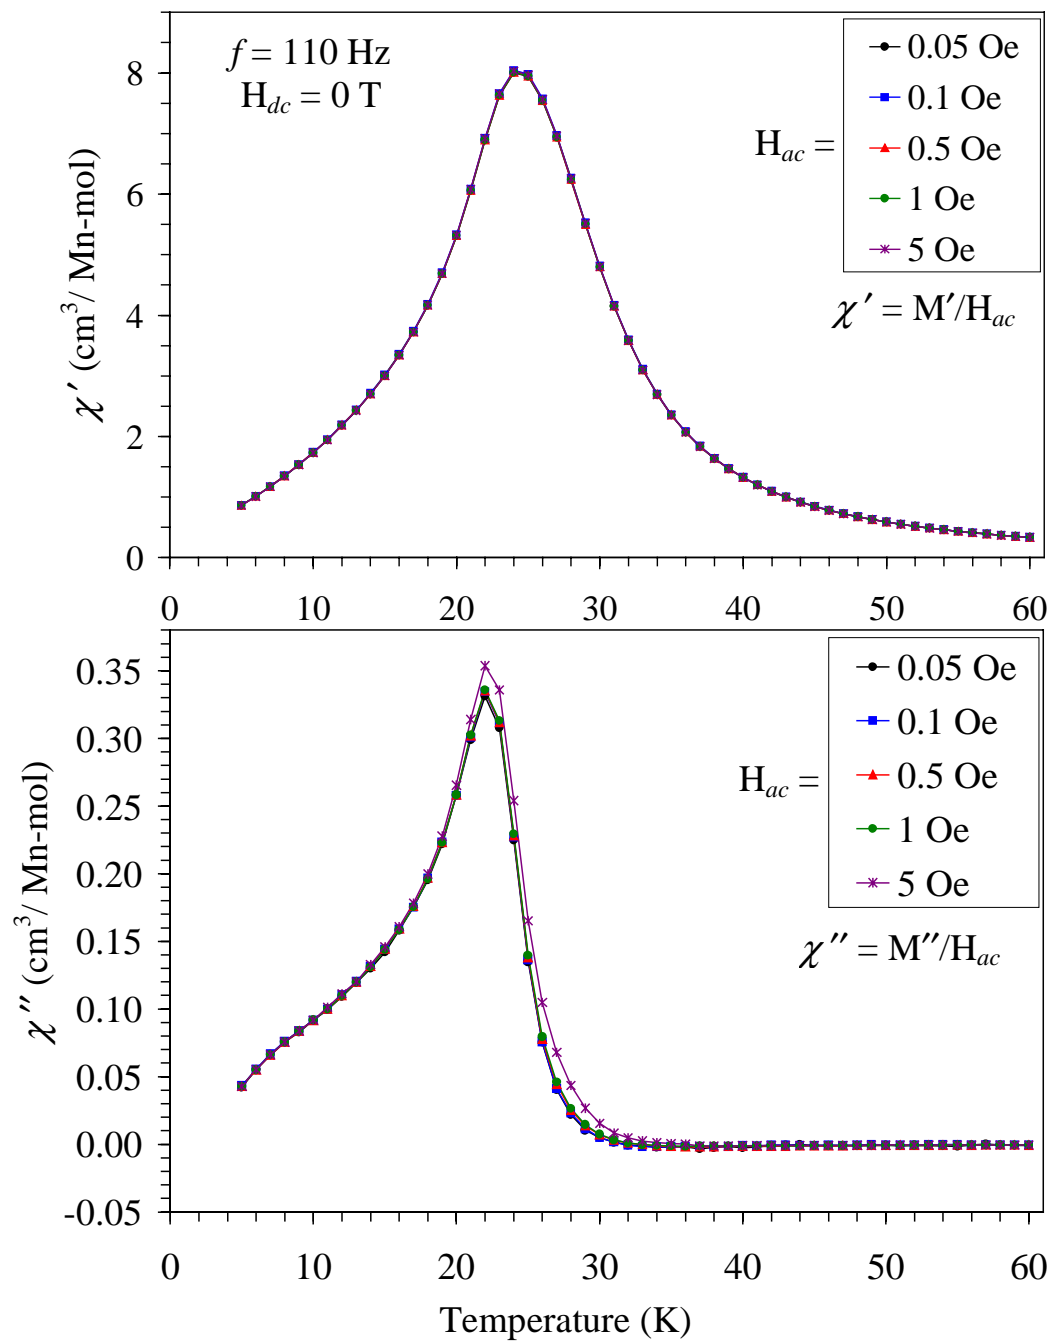

**Fig. S3.** The ac susceptibilities of BiMn<sub>0.6</sub>Sc<sub>0.4</sub>O<sub>3</sub> measured at zero static magnetic field, one frequency of 110 Hz, and different applied oscillating magnetic fields ( $H_{ac}$ ) from 5 to 60 K (on heating).



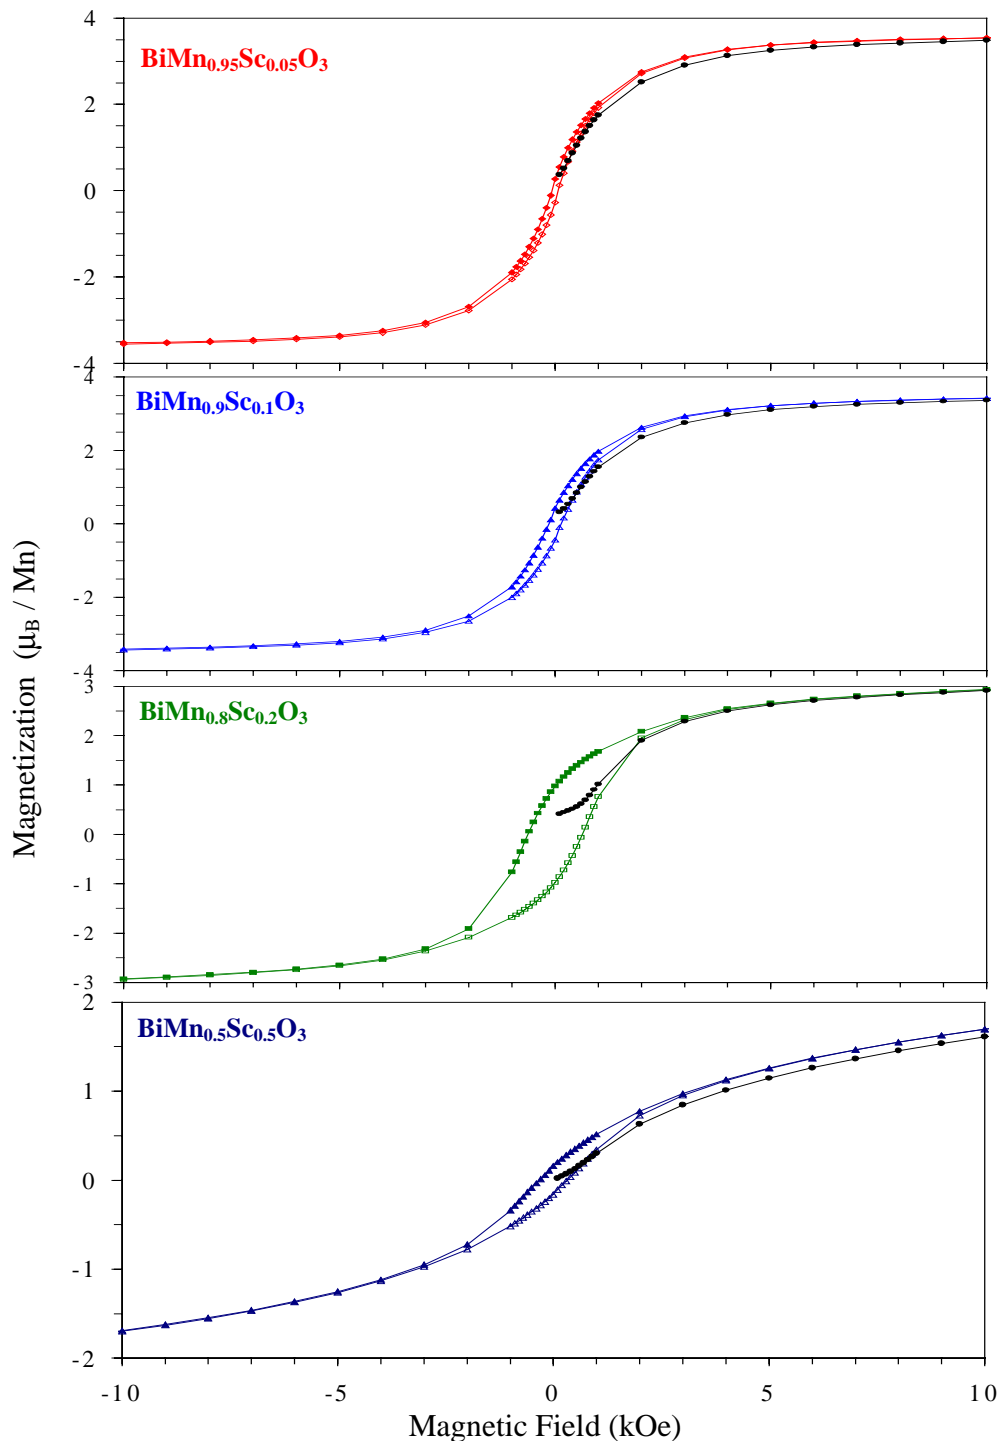

**Fig. S4.** The enlarged isothermal magnetization curves between  $-10$  and  $10$  kOe at  $5$  K in  $\text{BiMn}_{1-x}\text{Sc}_x\text{O}_3$ . The first magnetization curves from  $0$  to  $50$  kOe are given by black circles, the curves from  $50$  to  $-50$  kOe are given by filled symbols, and the curves from  $-50$  to  $50$  kOe are given by empty symbols. Note that the first magnetization curve is different (outside of the hysteresis loops) than other curves. This behavior of magnetization curves was observed in other manganites exhibiting spin-glass-like features (Karmakar, S.; Taran, S.; Chaudhuri, B. K.; Sakata, H.; Sun, C. P.; Huang, C. L.; Yang, H. D. *Phys. Rev. B* **2006**, 74, 104407 and references therein).

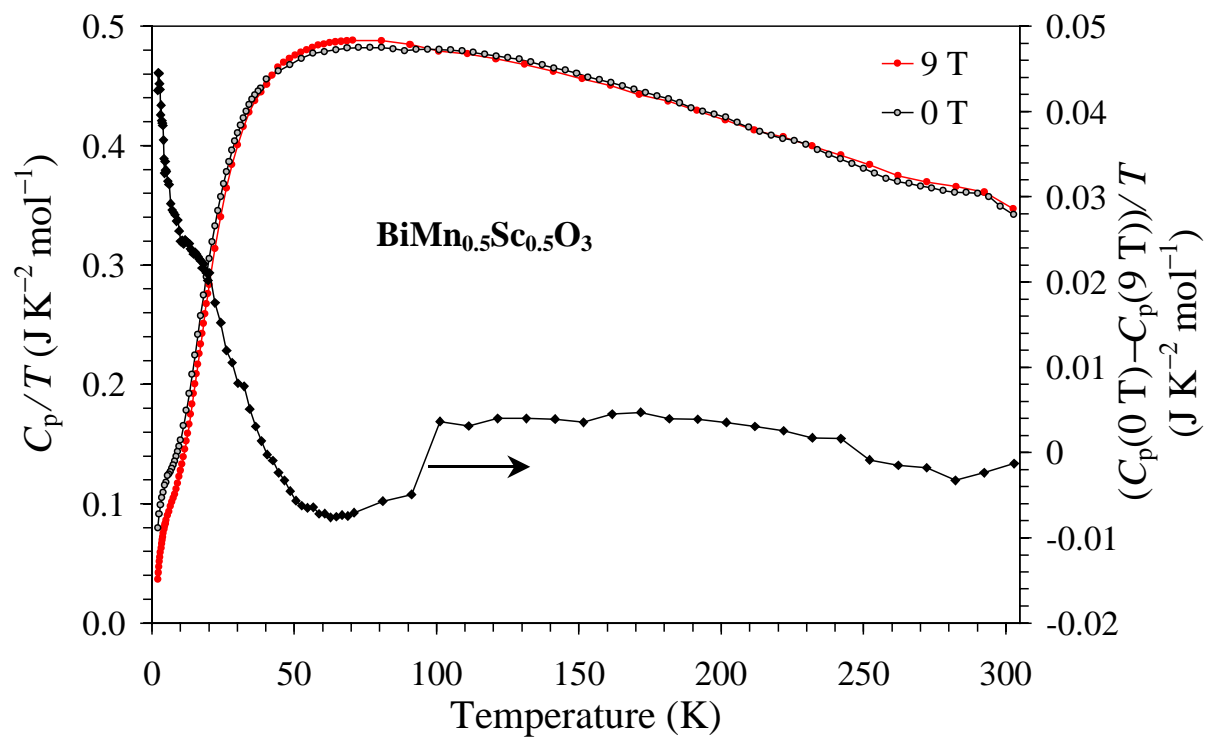

**Fig. S5.** The  $C_p/T$  vs  $T$  curves between 2 and 300 K for  $\text{BiMn}_{0.5}\text{Sc}_{0.5}\text{O}_3$  at 0 and 9 T. The secondary axis gives the  $(C_p(0 \text{ T}) - C_p(9 \text{ T}))/T$  vs  $T$  curve.

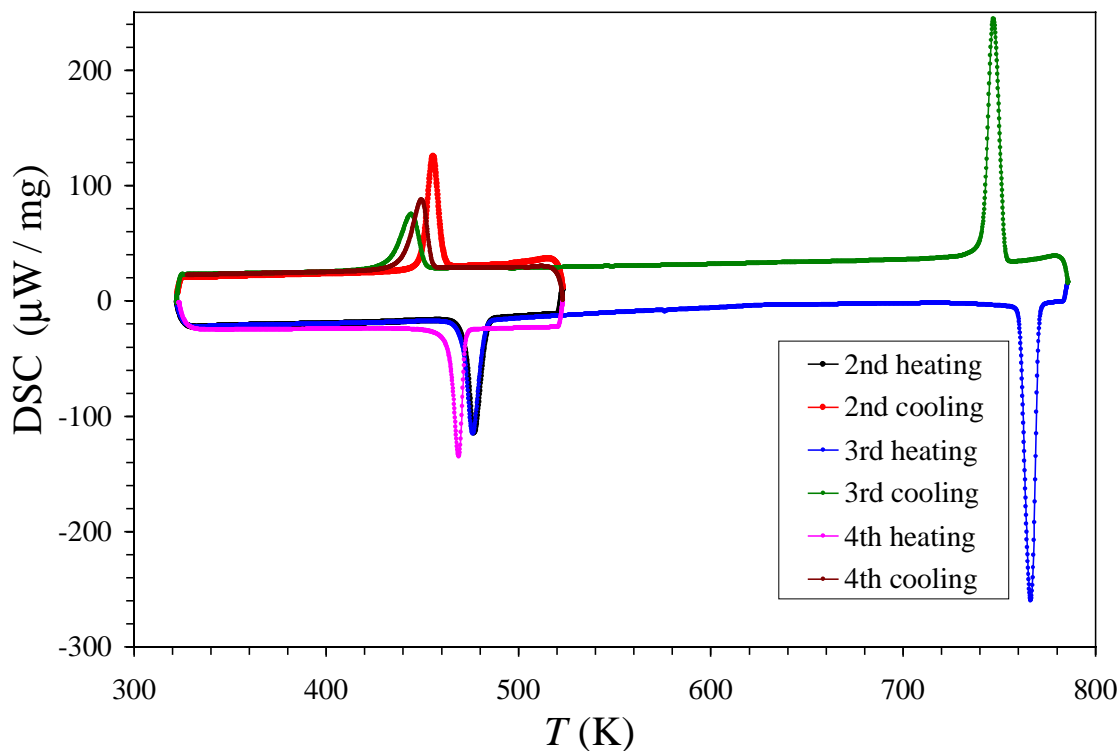

**Fig. S6.** Details of the DSC curves of  $\text{BiMnO}_3$ . The first (not shown) and second cycles are between 300 and 520 K. During the third cycle, the  $\text{BiMnO}_3$  sample was heated up to 785-790 K. The forth, fifth (not shown), and sixth (not shown) cycles are between 300 and 520 K. There was no difference between the 4<sup>th</sup>, 5<sup>th</sup>, and 6<sup>th</sup> cycles. However, note the difference between the 2<sup>nd</sup> and 4<sup>th</sup> cycles. The difference may be explained by the tiny oxygen stoichiometry changes during the heating up to 790 K in air.

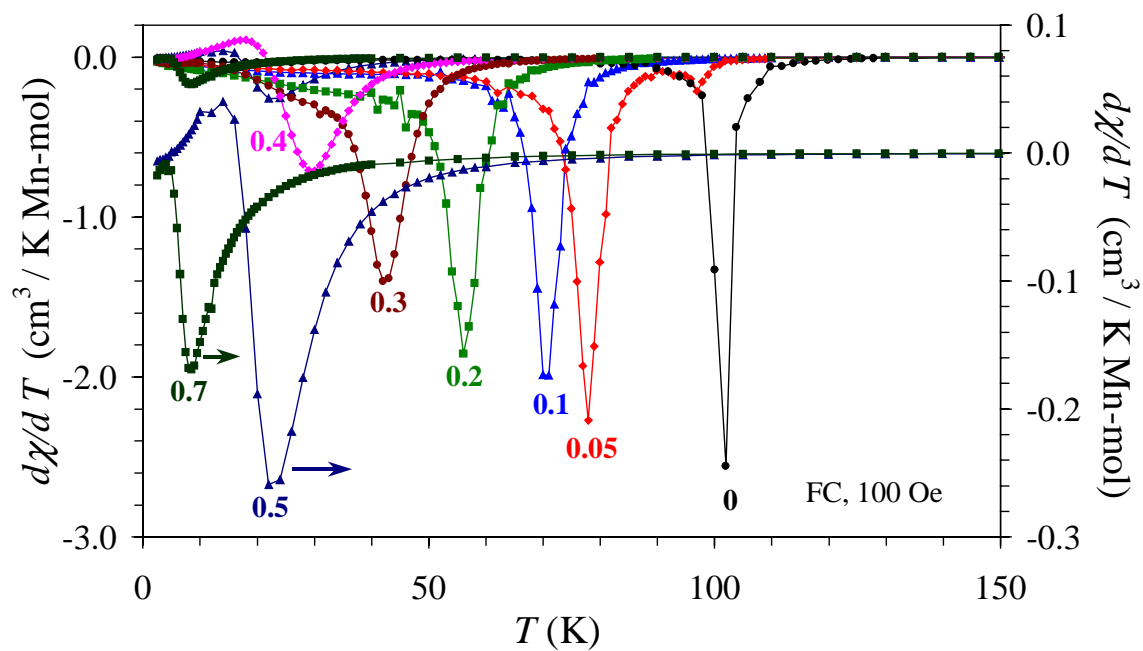

**Fig. S7.** The FC  $d\chi/dT$  vs  $T$  curves of  $\text{BiMn}_{1-x}\text{Sc}_x\text{O}_3$ . The secondary axis gives the enlarged curves for  $x = 0.5$  and  $0.7$ .
